# Supplementary material
Source: Springer Nature journal article supplement (https://www.springermedizin.de/resource/supplementary/12885_2009_2054_MOESM3_ESM.pdf/9460404)

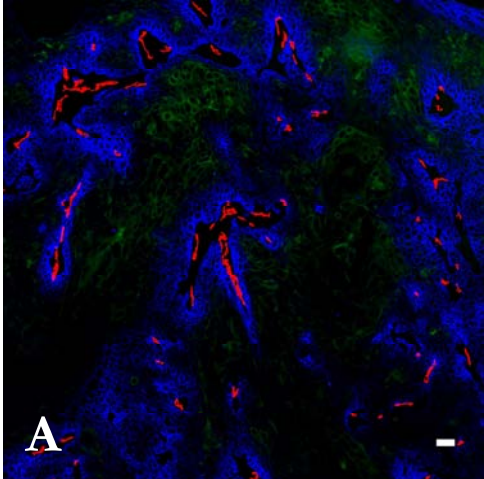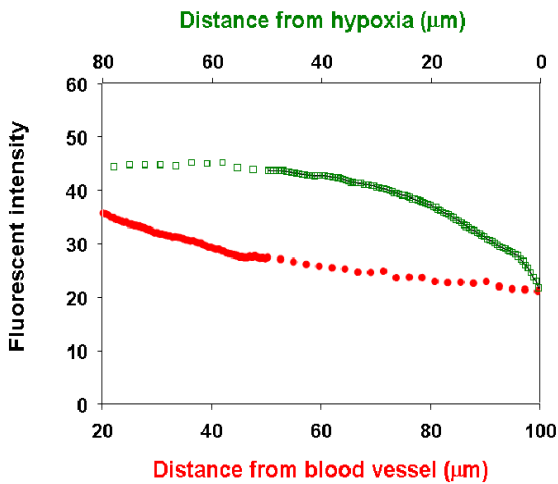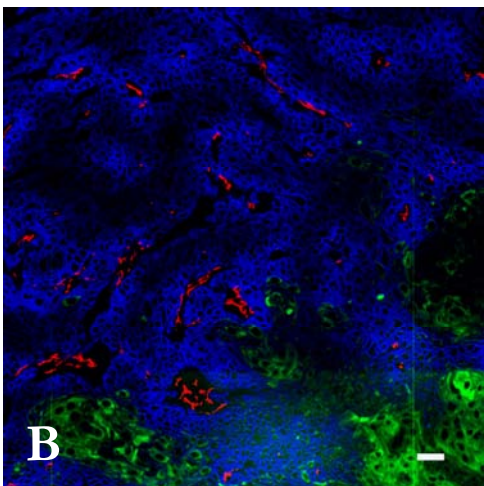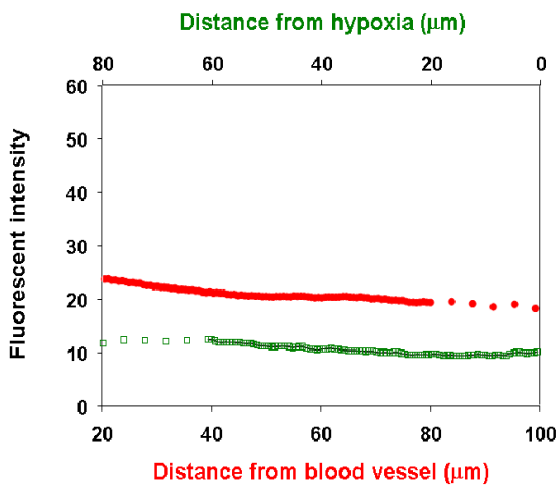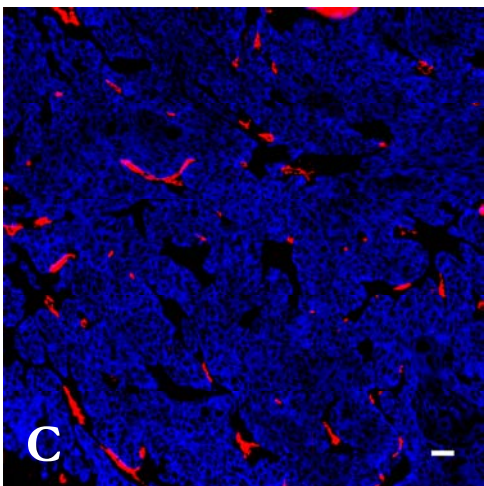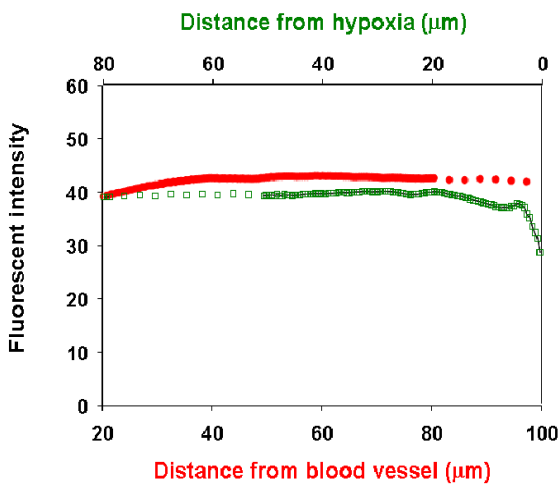

Supplement: MOESM3 [file 9460404]
